# Supplementary material
Source: PubMed Central journal article supplement (PMC4131687)
Supplement: NIHMS424889-supplement-1.pdf [file NIHMS424889-supplement-1.pdf]

**Supplementary Material**

**Distinct disulfide isomers of  $\mu$ -conotoxins KIIIA and KIIIB block voltage-gated sodium channels**

**Keith K. Khoo,<sup>†,‡,§</sup> Kallol Gupta,<sup>||</sup> Brad R. Green,<sup>†</sup> Min-Min Zhang,<sup>±</sup> Maren Watkins,<sup>±</sup> Baldomero M. Olivera,<sup>±</sup> Padmanabhan Balaram,<sup>||</sup> Doju Yoshikami,<sup>±</sup> Grzegorz Bulaj,<sup>@</sup> and Raymond S. Norton<sup>†,\*</sup>**

<sup>†</sup> Medicinal Chemistry, Monash Institute of Pharmaceutical Sciences, Monash University, 381 Royal Parade, Parkville VIC 3052, Australia

<sup>‡</sup> The Walter & Eliza Hall Institute of Medical Research, 1G Royal Parade, Parkville, VIC 3052, Australia

<sup>§</sup> The Department of Medical Biology, The University of Melbourne, Parkville, Victoria 3010, Australia

<sup>||</sup> Molecular Biophysics Unit, Indian Institute of Science, Bangalore, 560 012, India

<sup>±</sup> Department of Biology, University of Utah, Salt Lake City, Utah 84112, USA

<sup>@</sup> Department of Medicinal Chemistry, College of Pharmacy, University of Utah, Salt Lake City, Utah 84108, USA

**Table S1. Sequences of the M-4 and M-5 branches of the  $\mu$ -conotoxin superfamily**

| <b>Conotoxin</b>  | <b>Sequence</b>                                               | <b>Reference</b>                  |
|-------------------|---------------------------------------------------------------|-----------------------------------|
| <b>M-4 branch</b> |                                                               |                                   |
| $\mu$ -GIIIA      | RD <b>CC</b> TOOKK- <b>CK</b> DRQ <b>CKOQR</b> - <b>CCA</b> * | Cruz <i>et al.</i> (1985) (1)     |
| $\mu$ -GIIIB      | RD <b>CC</b> TOORK- <b>CK</b> DR <b>CKOMK</b> - <b>CCA</b> *  | Cruz <i>et al.</i> (1985) (1)     |
| $\mu$ -TIIIA      | RHG <b>CC</b> KGOKG- <b>CSS</b> RE <b>CROQH</b> - <b>CC</b> * | Lewis <i>et al.</i> (2007) (2)    |
| $\mu$ -PIIIA      | ZRL <b>CC</b> GFOKS- <b>CRSRQ</b> <b>CKOHR</b> - <b>CC</b> *  | Safo <i>et al.</i> (2000) (3)     |
| $\mu$ -SxIIIA     | R <b>CC</b> TGKKGS <b>CS</b> GR <b>ACKNLK</b> - <b>CCA</b> *  | Walewska <i>et al.</i> (2008) (4) |
| <b>M-5 branch</b> |                                                               |                                   |
| $\mu$ -KIIIA      | <b>CC</b> -N---- <b>CSS</b> KW <b>CRDHSRCC</b> *              | Bulaj <i>et al.</i> (2005) (5)    |
| $\mu$ -KIIIB      | NG <b>CC</b> -N---- <b>CSS</b> KW <b>CRDHSRCC</b> *           | This work                         |
| $\mu$ -SIIIA      | ZN <b>CC</b> -NG-- <b>GCSS</b> KW <b>CRDHARCC</b> *           | Bulaj <i>et al.</i> (2005) (5)    |
| $\mu$ -SmIIIA     | ZR <b>CC</b> -NGRRG <b>CSS</b> RW <b>CRDHSRCC</b> *           | West <i>et al.</i> (2002) (6)     |
| $\mu$ -CnIIIC     | ZG <b>CC</b> -NGPKG <b>CSS</b> KW <b>CRDHARCC</b> *           | Favreau <i>et al.</i> (2012) (7)  |
| $\mu$ -BuIIIB     | VGER <b>CC</b> KNGKRG <b>CG</b> -RW <b>CRDHSRCC</b> *         | Holford <i>et al.</i> (2009) (8)  |

**Table S2. Prepropeptide sequences of  $\mu$ -conotoxins determined from cDNA clones.  $\square$  indicates putative cleavage site to produce the mature conotoxin sequence, which is underlined.**

| Conotoxin    | Sequence                                                                       | Ref.                             |
|--------------|--------------------------------------------------------------------------------|----------------------------------|
| $\mu$ -PIIA  | MMSKLGVLLTICLLLPITALPMDGDQPADRLAERMQDNISSEEHPEKRSQRLCCGFPKSCRSRQCKPHRCCGR      | Corpuz <i>et al.</i> (2005) (9)  |
| $\mu$ -SIIIA | MMSKLGVLLTICLLFPALTALPMDEDQPADQLEDQMDDISSEYPSFVRRQKCCGEGSSCPKYFKNNFICGCC       | Wang <i>et al.</i> (2006) (10)   |
| $\mu$ -BuIIB | MMSKLGVLLTICLLFPALFALPQDGDQPADRPAERMQDDISSEQNPLEKRSVGERCCKNGKRGCGRWCRDHSRCCGRR | Holford <i>et al.</i> (2009) (8) |
| $\mu$ -GIIIA | MMSKLGVLLTICLLFPALTALPMDGDEPANRPVERMQDNISSEYPLFEKRSRDCTPPKKCKDRQCKPQRCCAGR     | Corpuz <i>et al.</i> (2005) (9)  |
| $\mu$ -KIIB  | -----KRNGCCN---CSSKWCRDHSRCCGR                                                 | This work                        |

In addition to the two major disulfide isomers characterized in this paper, the biological activity and structure of the disulfide-deficient analog  $\mu$ -KIIIA[C1A,C9A], which has the [C2-C15,C4-C16] disulfide connectivity, were characterized previously.<sup>22</sup> Intercysteine NOEs observed for the previously published structures of this analog and  $\mu$ -KIIIA<sup>22</sup> are summarized in Table S3. For  $\mu$ -KIIIA, disulfide connectivities could not be determined unambiguously except for the [C4-C16] connectivity, with an NOE observed between C <sup>$\alpha$</sup> H of Cys16 and C <sup>$\beta$</sup> H of Cys4. C <sup>$\beta$</sup> H-C <sup>$\beta$</sup> H NOEs from Cys2 to Cys9 could be overlapped with sequential NOEs between Arg10 C <sup>$\alpha$</sup> H and Cys9 C <sup>$\beta$</sup> H. In contrast, intercysteine NOEs were more clearly defined for the  $\mu$ -KIIIA[C1A,C9A] analog, in which only two disulfide bonds were present. In addition to intercysteine NOEs observed between Cys4 and Cys16, C <sup>$\beta$</sup> H-C <sup>$\beta$</sup> H NOEs between Cys2 and Cys15 were observed for this analog, thus defining its disulfide connectivity.

**Table S3. Intercysteine NOEs observed for  $\mu$ -KIIIA and  $\mu$ -KIIIA[C1A,C9A]. \* indicates undetermined intensity due to overlap with other cross peaks. + in parentheses indicates intensity of the NOE.**

$\mu$ -KIIIA

| Disulfide | HA-HA | HA-HB             | HB-HB                                    | HN-HB | Antidiagnostic HN-HA |
|-----------|-------|-------------------|------------------------------------------|-------|----------------------|
| C1-C15    | -     | -                 | HB2 1 – HB2 15 (*)                       | -     | -                    |
| C2-C9     | -     | -                 | HB2 2 – HB2 9 (*)<br>HB2 2 – HB3 9 (*)   | -     | -                    |
| C4-C16    | -     | HA 16 – HB3 4 (+) | HB2 16 – HB2 4 (*)<br>HB2 16 – HB3 4 (*) | -     | -                    |

$\mu$ -KIIIA[C1A,C9A]

| Disulfide | HA-HA | HA-HB                                  | HB-HB                                     | HN-HB | Antidiagnostic HN-HA |
|-----------|-------|----------------------------------------|-------------------------------------------|-------|----------------------|
| C2-C15    | -     | HA 2 – HB2 15 (*)<br>HA 2 – HB3 15 (*) | HB2 15 – HB3 2 (++)                       | -     | -                    |
| C4-C16    | -     | HA 16-HB3 4 (+)                        | HB2 16 – HB2 4 (++)<br>HB2 16 – HB3 4 (+) | -     | -                    |

**Table S4. Block of Nav1.2, 1.4 and 1.7 by  $\mu$ -KIII A-P2.<sup>a</sup>**

| <b>Nav<br/>subtypes</b> | <b><math>k_{\text{off}}</math><br/>(<math>\text{min}^{-1}</math>)</b> | <b><math>k_{\text{on}}^b</math><br/>(<math>\mu\text{M}\cdot\text{min}</math>)<sup>-1</sup></b> | <b><math>K_d^c</math><br/>(<math>\mu\text{M}</math>)</b> |
|-------------------------|-----------------------------------------------------------------------|------------------------------------------------------------------------------------------------|----------------------------------------------------------|
| Nav1.2                  | 0.0044 $\pm$ 0.0023                                                   | 0.019 $\pm$ 0.002                                                                              | 0.23 $\pm$ 0.12                                          |
| Nav1.4                  | 0.083 $\pm$ 0.026                                                     | 0.1 $\pm$ 0.02                                                                                 | 0.83 $\pm$ 0.31                                          |
| Nav1.7                  | 0.011 $\pm$ 0.001                                                     | 0.007 $\pm$ 0.004                                                                              | 1.57 $\pm$ 0.91                                          |

<sup>a</sup> Values (mean  $\pm$  S.D,  $n \geq 3$  oocytes) were obtained by two-electrode voltage clamp of *Xenopus* oocytes expressing rat Nav1 channels as described in Methods and Materials. <sup>b</sup> From  $[k_{\text{obs}} - k_{\text{off}}] / 10\mu\text{M}$ . <sup>c</sup> From  $k_{\text{off}}/k_{\text{on}}$ .

### **Determination of disulfide connectivity of $\mu$ -KIIIB isomer.**

The MS<sup>2</sup> spectrum of  $\mu$ -KIIIB-P2 shows an identical spectrum to that of peak1 and peak2 of  $\mu$ -KIIIA (Figure S3), with the exception of the ions containing the N-terminal Asn-Gly. In a similar manner, only two foldamers (F11, F14) fit all the MS<sup>2</sup> fragment ions. Subsequent MS<sup>3</sup> fragmentation of 1100.5, which is identical in structure with 929.5 of  $\mu$ -KIIIA (with the N-terminal extension), reveal the disulfide connectivity. Beside the N-terminal residue losses, giving rise to 986.3 and 929.3, ions at m/z 843.1 and 656.1 are observed, as in the MS<sup>3</sup> spectrum of 929.3 in  $\mu$ -KIIIA-P1. As in the case of  $\mu$ -KIIIA-P1, the ion 656.1 clarifies the unambiguous assignment of the disulfide connectivity. In this case, ambiguity arising through the relatively low intensity of 656.1 is eliminated by the MS<sup>4</sup> fragmentation of 843.1 that shows the presence of the same ion. The scheme of events is summarized in Figure S4. An identical MS<sup>2</sup> spectra for Peak-1 of  $\mu$ -KIIIB (Figure S5), leaves again F11 and 14 as the two probable foldamers. As F11 has already been assigned to P2, the disulfide connectivity of  $\mu$ -KIIIB-P1 is therefore assigned as F14.

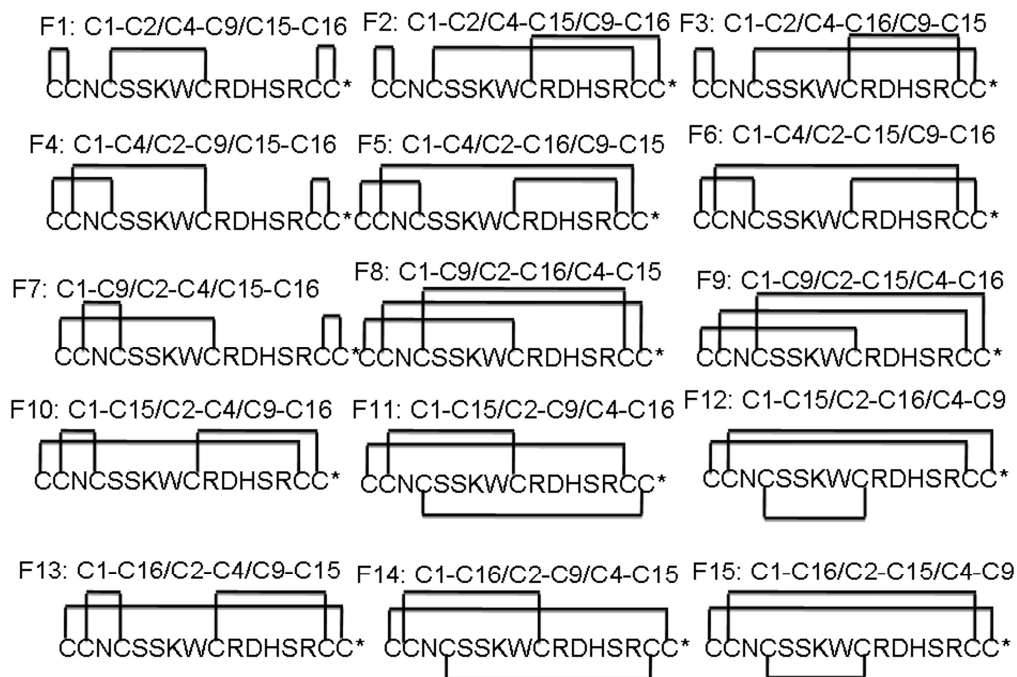

**Figure S1.** 15 possible foldamers of  $\mu$ -KIIIA-P1

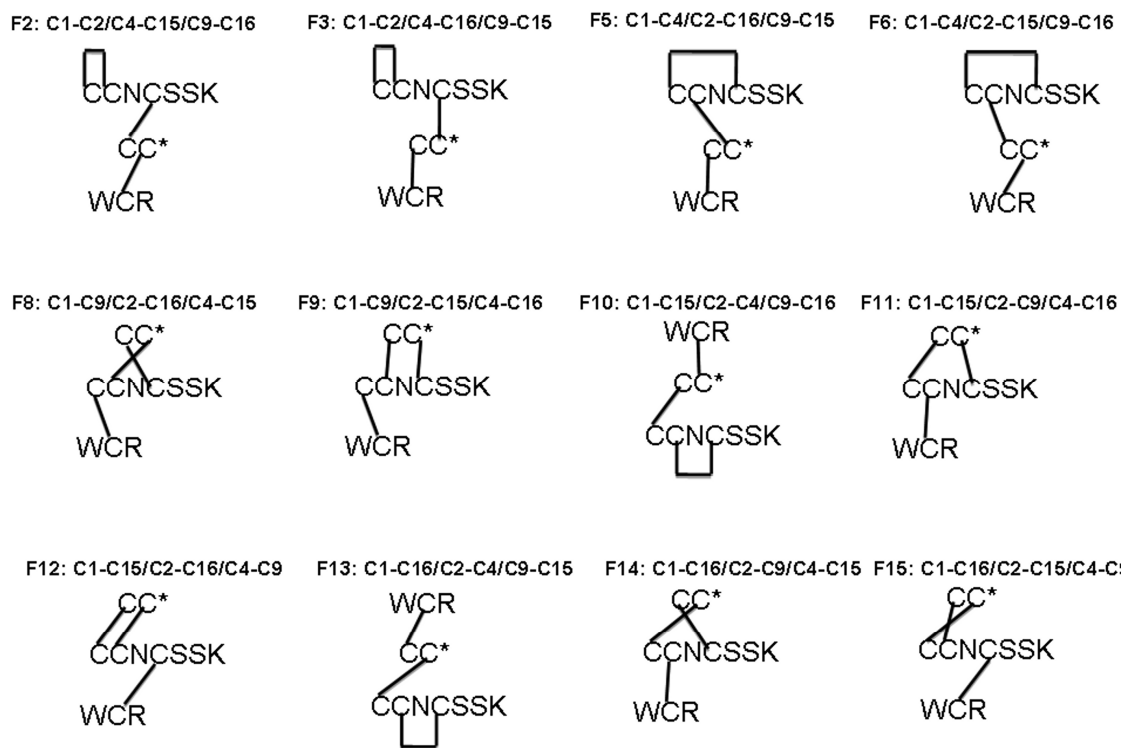

**Figure S2.** 12 possible foldamers of  $\mu$ -KIIIA-P1 upon trypsin digestion



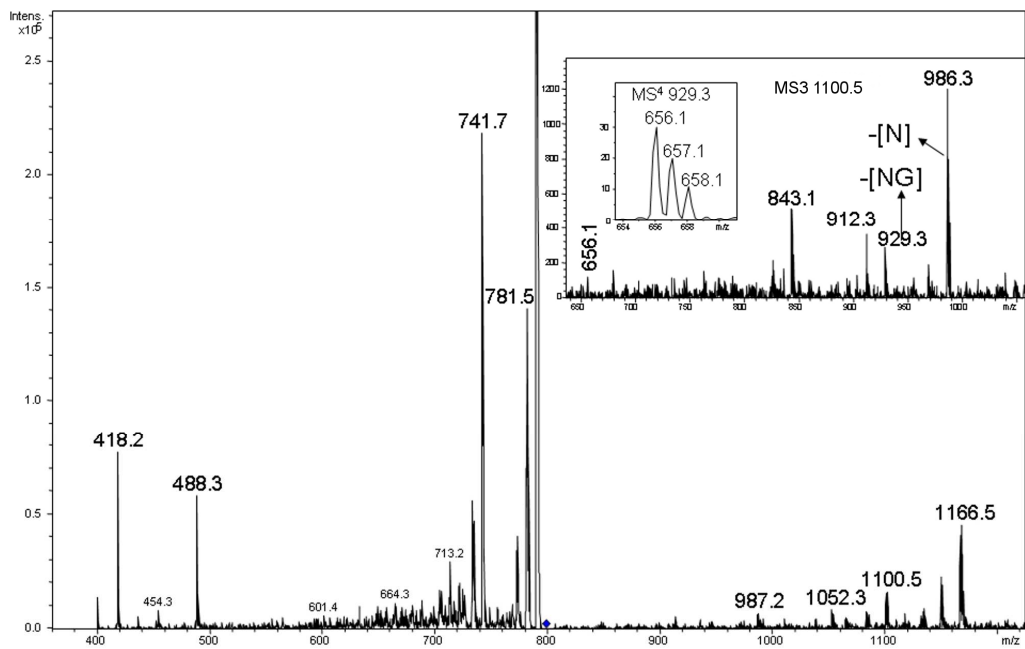

**Figure S3.** CID MS<sup>2</sup> spectrum of the peptide derived upon trypsin digestion of  $\mu$ -KIIIB-P2. Inset shows the MS<sup>3</sup> spectra of 1101.5 and MS<sup>4</sup> of 843.1.

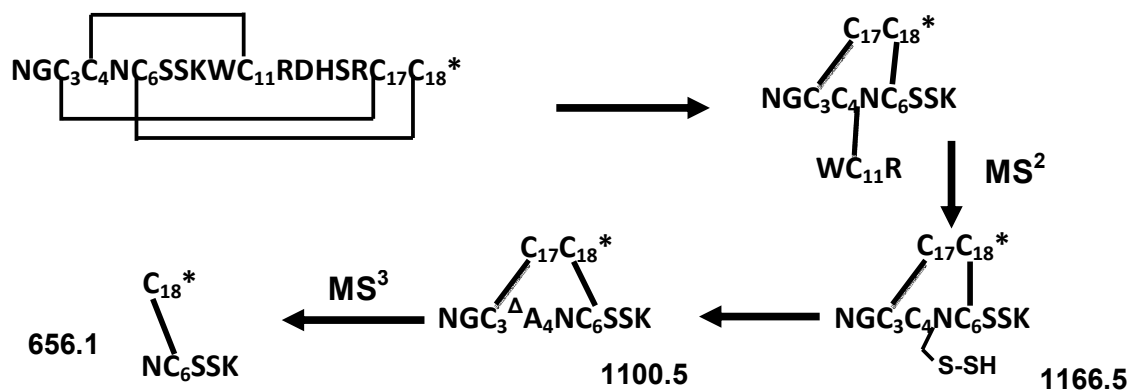

**Figure S4.** Assignments of the key  $MS^n$  fragment ions of tryptic  $\mu$ -KIIIB-P2.

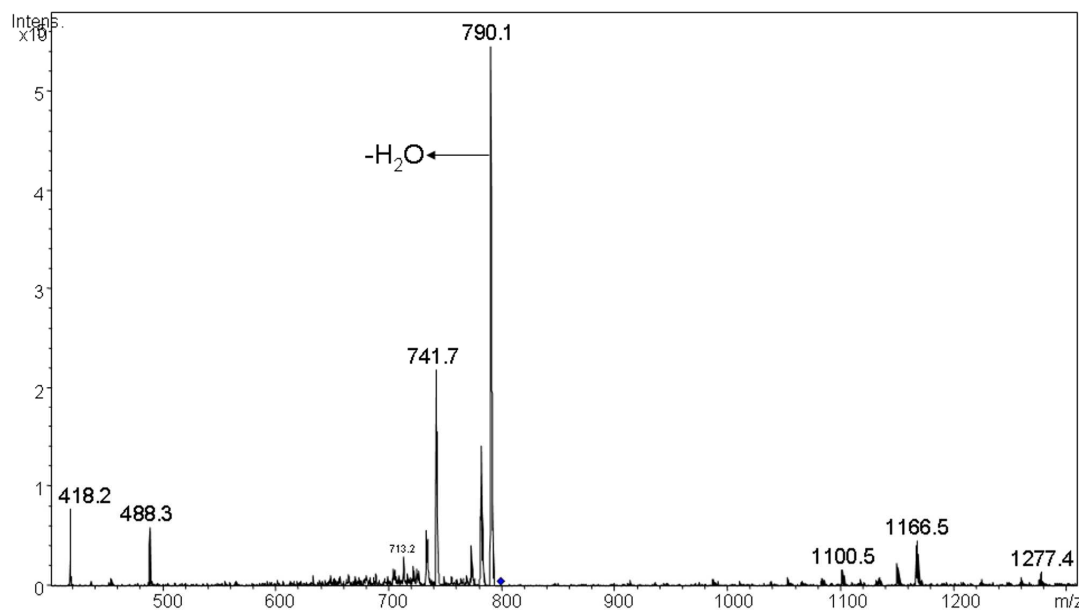

**Figure S5.** CID MS<sup>2</sup> spectrum of the peptide derived upon trypsin digestion of  $\mu$ -KIIIB-P1.

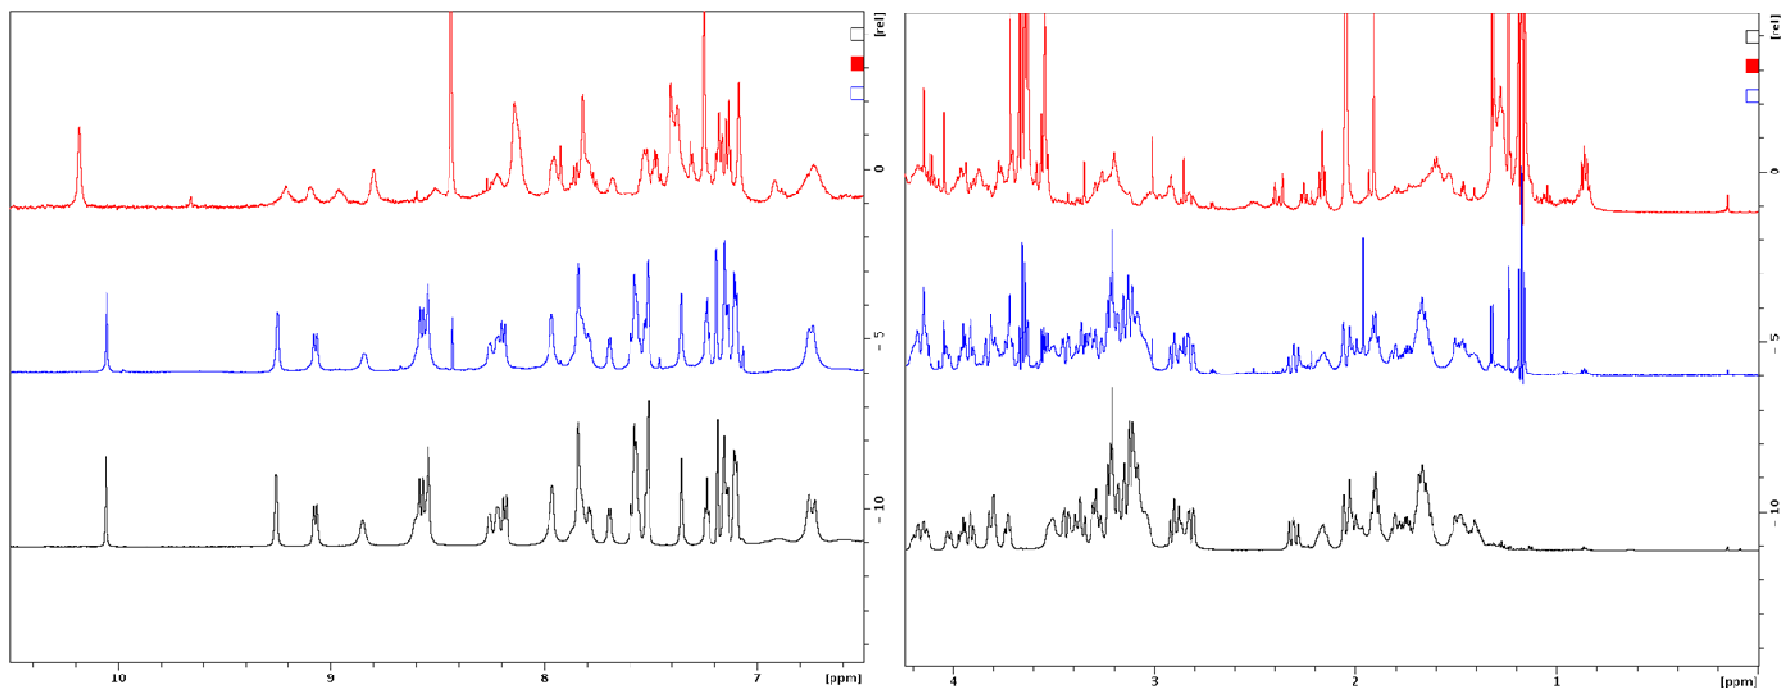

**Figure S6.** 1D <sup>1</sup>H NMR spectra of  $\mu$ -KIIIA-P1 (blue) and  $\mu$ -KIIIA-P2 (red) recorded at 5 °C, pH 4.8 on a Bruker-DRX 600 spectrometer, compared with  $\mu$ -KIIIA sample (black) for which solution structure was determined previously by Khoo *et al.* Left panel displays the amide region, right panel the aliphatic region.

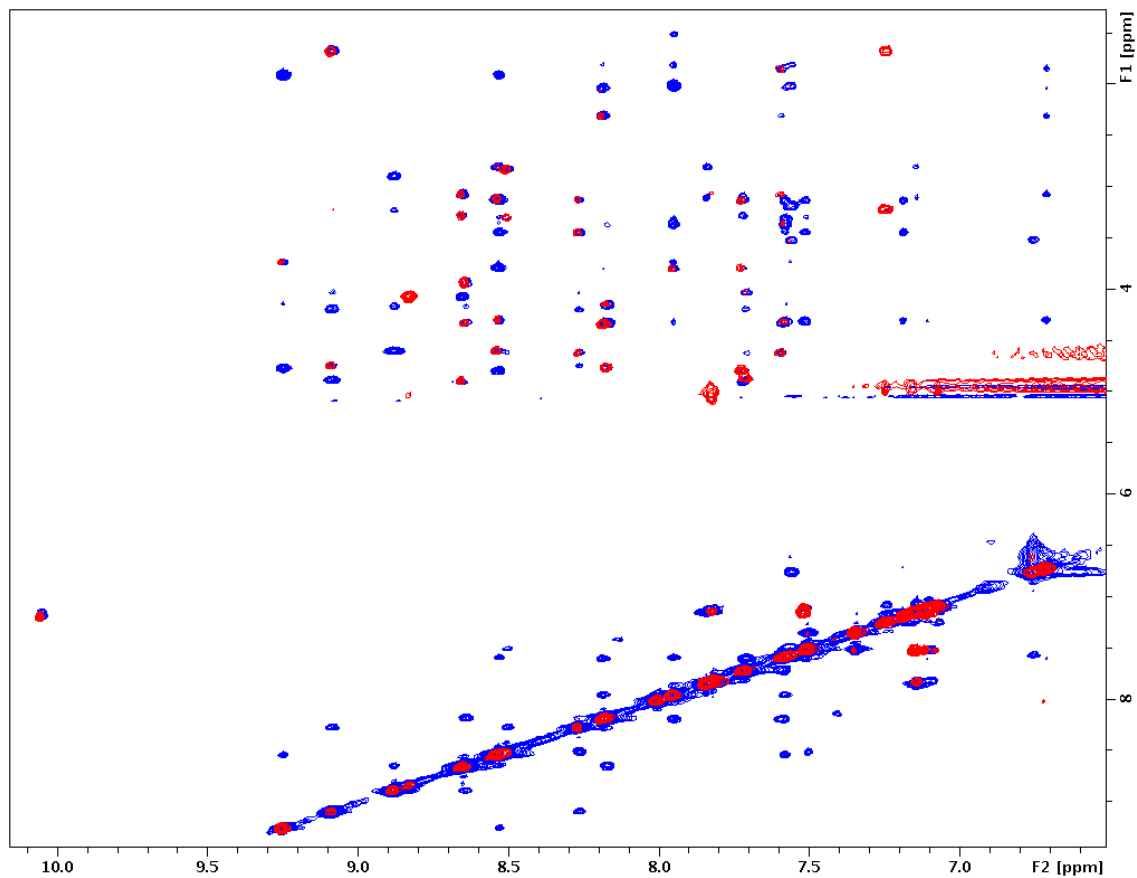

**Figure S7.** Amide and aromatic region of NOESY spectrum (blue) overlaid with TOCSY spectrum (red) for  $\mu$ -KIIIB-P2 (at 5 °C and pH 4.8). NOESY (250 ms mixing time) and TOCSY (70 ms spin-lock time) spectra were acquired on a Bruker DRX-600 spectrometer.

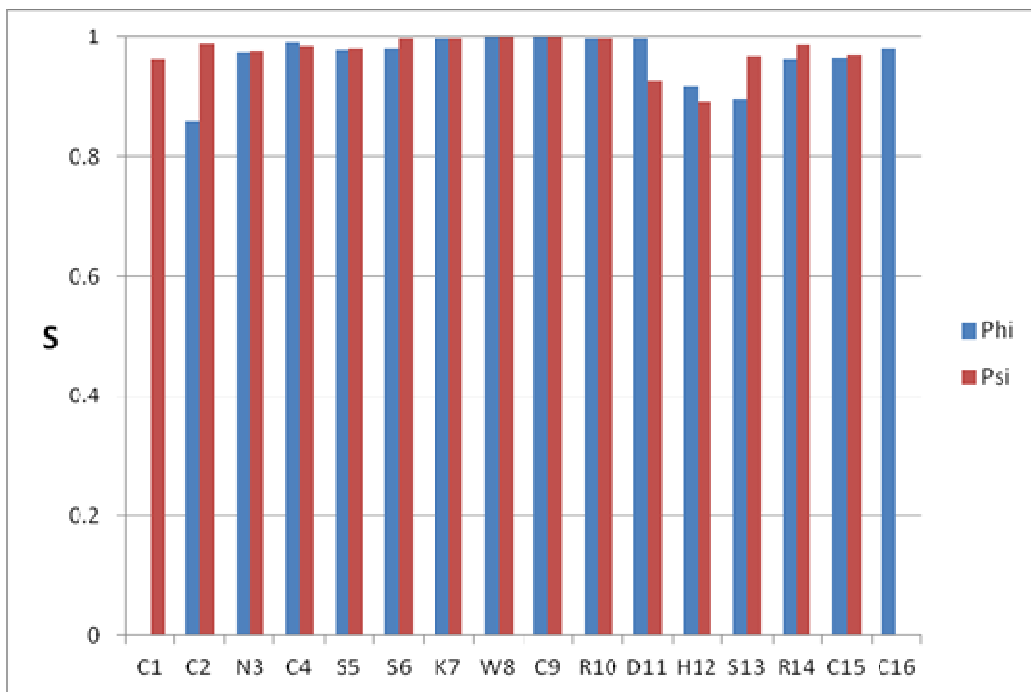

**Figure S8.** Angular order parameters (S) for the final 20 structures of  $\mu$ -KIIIA[C1-C15,C2-C9,C4-C16] measured using MOLMOL for  $\phi$  (blue) and  $\psi$  (red) backbone dihedral angles plotted as a function of residue.

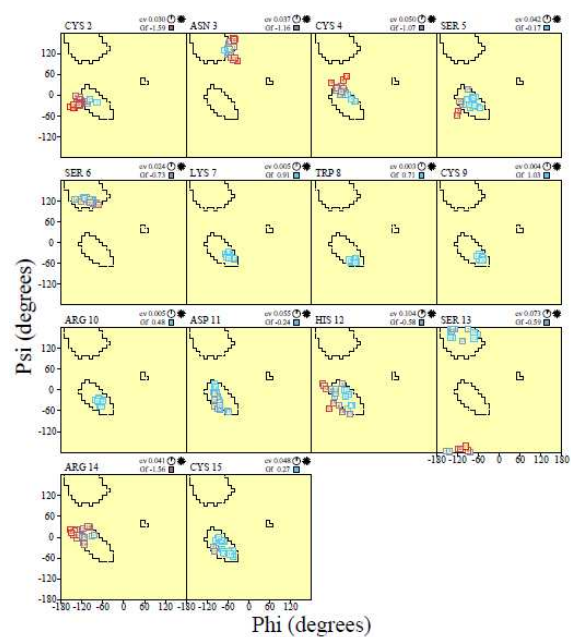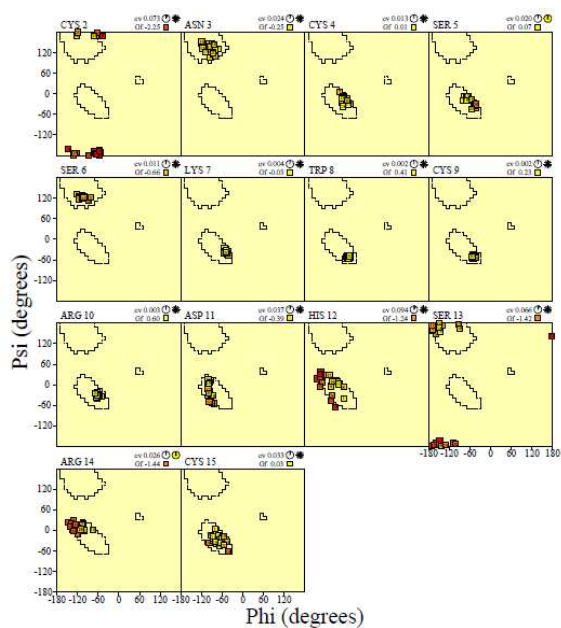

**Figure S9.** Residue Ramachandran plots of family of structures of  $\mu$ -KIIIA[C1-C9,C2-C15,C4-C16] (top) and  $\mu$ -KIIIA[C1-C15,C2-C9,C4-C16] (bottom)

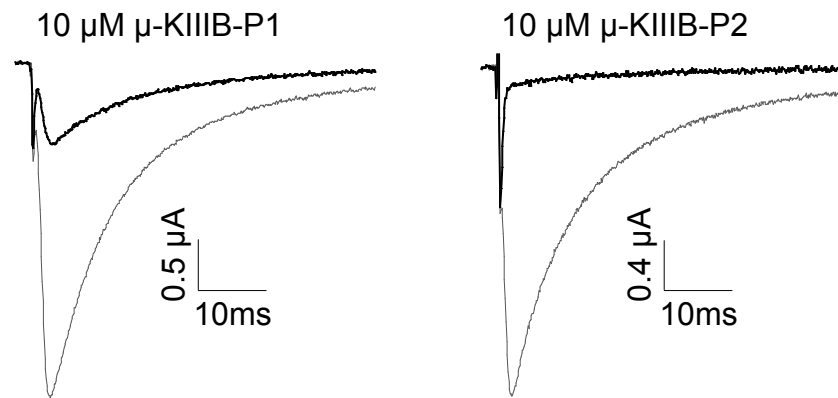

**Figure S10.** Representative sodium-current traces from voltage-clamped oocytes expressing rat Nav1.2.  $\mu$ -KIIIB-P1 (left) and  $\mu$ -KIIIB-P2 (right) were each tested at a concentration of 10  $\mu$ M. Each panel shows superimposed recordings before (control, *gray trace*) and after (*black trace*) 20-min exposure to the indicated peptide.



## References

- (1) Cruz, L. J., Gray, W. R., Olivera, B. M., Zeikus, R. D., Kerr, L., Yoshikami, D., and Moczydlowski, E. (1985) *Conus geographus* toxins that discriminate between neuronal and muscle sodium channels, *J Biol Chem* 260, 9280-9288.
- (2) Lewis, R. J., Schroeder, C. I., Ekberg, J., Nielsen, K. J., Loughnan, M., Thomas, L., Adams, D. A., Drinkwater, R., Adams, D. J., and Alewood, P. F. (2007) Isolation and structure-activity of  $\mu$ -conotoxin TIIIA, a potent inhibitor of tetrodotoxin-sensitive voltage-gated sodium channels, *Mol Pharmacol* 71, 676-685.
- (3) Safo, P., Rosenbaum, T., Shcherbatko, A., Choi, D. Y., Han, E., Toledo-Aral, J. J., Olivera, B. M., Brehm, P., and Mandel, G. (2000) Distinction among neuronal subtypes of voltage-activated sodium channels by  $\mu$ -conotoxin PIIIA, *J Neurosci* 20, 76-80.
- (4) Walewska, A., Skalicky, J. J., Davis, D. R., Zhang, M. M., Lopez-Vera, E., Watkins, M., Han, T. S., Yoshikami, D., Olivera, B. M., and Bulaj, G. (2008) NMR-based mapping of disulfide bridges in cysteine-rich peptides: application to the  $\mu$ -conotoxin SxIIIA, *J Am Chem Soc* 130, 14280-14286.
- (5) Bulaj, G., West, P. J., Garrett, J. E., Watkins, M., Zhang, M. M., Norton, R. S., Smith, B. J., Yoshikami, D., and Olivera, B. M. (2005) Novel conotoxins from *Conus striatus* and *Conus kinoshitai* selectively block TTX-resistant sodium channels, *Biochemistry* 44, 7259-7265.
- (6) West, P. J., Bulaj, G., Garrett, J. E., Olivera, B. M., and Yoshikami, D. (2002)  $\mu$ -conotoxin SmIIIA, a potent inhibitor of tetrodotoxin-resistant sodium channels in amphibian sympathetic and sensory neurons, *Biochemistry* 41, 15388-15393.
- (7) Favreau, P., Benoit, E., Hocking, H. G., Carlier, L., D, D. H., Leipold, E., Markgraf, R., Schlumberger, S., Cordova, M. A., Gaertner, H., Paolini-Bertrand, M., Hartley, O., Tytgat, J., Heinemann, S. H., Bertrand, D., Boelens, R., Stocklin, R., and Molgo, J. (2012) A novel  $\mu$ -conopeptide, CnIIIC, exerts potent and preferential inhibition of Na(V) 1.2/1.4 channels and blocks neuronal nicotinic acetylcholine receptors, *Br J Pharmacol* 166, 1654-1668.
- (8) Holford, M., Zhang, M. M., Gowd, K. H., Azam, L., Green, B. R., Watkins, M., Ownby, J. P., Yoshikami, D., Bulaj, G., and Olivera, B. M. (2009) Pruning nature: Biodiversity-derived discovery of novel sodium channel blocking conotoxins from *Conus bullatus*, *Toxicon* 53, 90-98.
- (9) Corpuz, G. P., Jacobsen, R. B., Jimenez, E. C., Watkins, M., Walker, C., Colledge, C., Garrett, J. E., McDougal, O., Li, W., Gray, W. R., Hillyard, D. R., Rivier, J., McIntosh, J. M., Cruz, L. J., and Olivera, B. M. (2005) Definition of the M-conotoxin superfamily: characterization of novel peptides from molluscivorous *Conus* venoms, *Biochemistry* 44, 8176-8186.
- (10) Wang, C. Z., Zhang, H., Jiang, H., Lu, W., Zhao, Z. Q., and Chi, C. W. (2006) A novel conotoxin from *Conus striatus*,  $\mu$ -SIIIA, selectively blocking rat tetrodotoxin-resistant sodium channels, *Toxicon* 47, 122-132.
